# Supplementary material for: Using a vector pool containing variable-strength promoters to optimize protein production in Yarrowia lipolytica
Source: Microb Cell Fact. 2017 Feb 17;16:31. doi: 10.1186/s12934-017-0647-3 (PMC5316184; doi:10.1186/s12934-017-0647-3)
Supplement: Supplementary file 6 — Additional file 6: Table S3. Xylanase activity levels. [file 12934_2017_647_MOESM6_ESM.xlsx]

## Sheet: Feuil1
Medium - Promoter	XlnC assay 1 (mU/mL)	XlnC assay 2 (mU/mL)	Average	Standard deviation
YNB - Y2900	0	0	0	0
YNB - pTef	1870.59	1923.53	1897.06	18.7175
YNB - 2UAS-pTef	10689.7	11611.8	11150.7	325.997
YNB - 3UAS-pTef	1625.74	1676.47	1651.1	17.9376
YNB - 4UAS-pTef	4477.94	4504.41	4491.18	9.35877
YNB - 8UAS-pTef	4720.59	4879.41	4800	56.1526
YNB - Hp4d	3163.24	3375	3269.12	74.8701
YNB - Hp8d	12624.3	12198.5	12411.4	150.52
YPD - Y2900	0	0	0	0
YPD - pTef	20029.4	17117.6	18573.5	1029.46
YPD - 2UAS-pTef	55367.6	46058.8	50713.2	3291.17
YPD - 3UAS-pTef	6948.53	12926.5	9937.5	2113.52
YPD - 4UAS-pTef	21507.4	27397.1	24452.2	2082.33
YPD - 8UAS-pTef	23294.1	18352.9	20823.5	1746.97
YPD - Hp4d	13455.9	12705.9	13080.9	265.165
YPD - Hp8d	43389.7	43323.5	43356.6	23.3969
YP2D4 - Y2900	0	0	0	0
YP2D4 - pTef	31257.4	35602.9	33430.1	1536.4
YP2D4 - 2UAS-pTef	162750	186176	174463	8282.51
YP2D4 - 3UAS-pTef	29095.6	30308.8	29702.2	428.943
YP2D4 - 4UAS-pTef	39264.7	51661.8	45463.2	4383.02
YP2D4 - 8UAS-pTef	37169.1	37632.4	37400.7	163.778
YP2D4 - Hp4d	40191.2	46411.8	43301.5	2199.31
YP2D4 - Hp8d	110051	110912	110482	304.16
